# Supplementary material for: Safety of direct oral anticoagulants in patients with hereditary hemorrhagic telangiectasia
Source: Springer Nature journal article supplement (doi:10.1186/s13023-019-1179-1), 2019-08-28
Supplement: MOESM2 [file 17111860]

## **Safety of direct oral anticoagulants in patients with hereditary hemorrhagic telangiectasia**

Shovlin CL, Millar CM, Droege F, Kjeldsen AD, Manfredi G, Suppressa P, Ugolini S, Coote N, Fialla AD, Geisthoff U, Lenato GM, Mager HJ, Pagella F, Post MC, Sabbà C, Sure U, Torring PM, Dupuis-Girod S, Buscarini E, VASCERN-HHT.

Orphanet Journal of Rare Diseases 2019

**ADDITIONAL FILE 2: Table S2: Dosing Regimes**

**Table S2: Dosing Regimes.**

| <b>Rivaroxaban</b>      | <b>Apixaban</b>                          | <b>Dabigatran</b>                                    |
|-------------------------|------------------------------------------|------------------------------------------------------|
| 15 mg bd*<br>or 20mg od | 10mg bd then<br>5mg bd*, or<br>2.5mg bd* | 75 mg bd or<br>110mg bd, or<br>150mg bd <sup>a</sup> |

All patients were treated with conventional dosing schedules and had normal renal function when subsequently evaluated by urea and electrolytes. <sup>a</sup>

Dose reported to be “tolerated” by patient though experiencing nosebleeds 4-5 times a day. Note the doses of DOAC reported are those registered for patients with acute VTE (Rivaroxaban, Apixaban). In AF Rivaroxaban is dosed 20 mg o.d. (reduced to 15 mg with CrCl<50 mg/mL) and Apixaban 5 mg b.i.d. (reduced to 2.5 mg b.i.d with appropriate criteria). The doses of Dabigatran are those registered in patients with AF in USA.
