# Supplementary material for: Safety of direct oral anticoagulants in patients with hereditary hemorrhagic telangiectasia
Source: Springer Nature journal article supplement (doi:10.1186/s13023-019-1179-1), 2019-08-28

## **Safety of direct oral anticoagulants in patients with hereditary hemorrhagic telangiectasia**

Shovlin CL, Millar CM, Droege F, Kjeldsen AD, Manfredi G, Suppressa P, Ugolini S, Coote N, Fialla AD, Geisthoff U, Lenato GM, Mager HJ, Pagella F, Post MC, Sabbà C, Sure U, Topping PM, Dupuis-Girod S, Buscarini E, VASCERN-HHT.

Orphanet Journal of Rare Diseases 2019

### **ADDITIONAL FILE 3:**

**Figure S1: Normal quantile plot of 4 point bleeding severity scale.**

**Figure S1:** Normal quantile plot of 4 point bleeding severity scale.

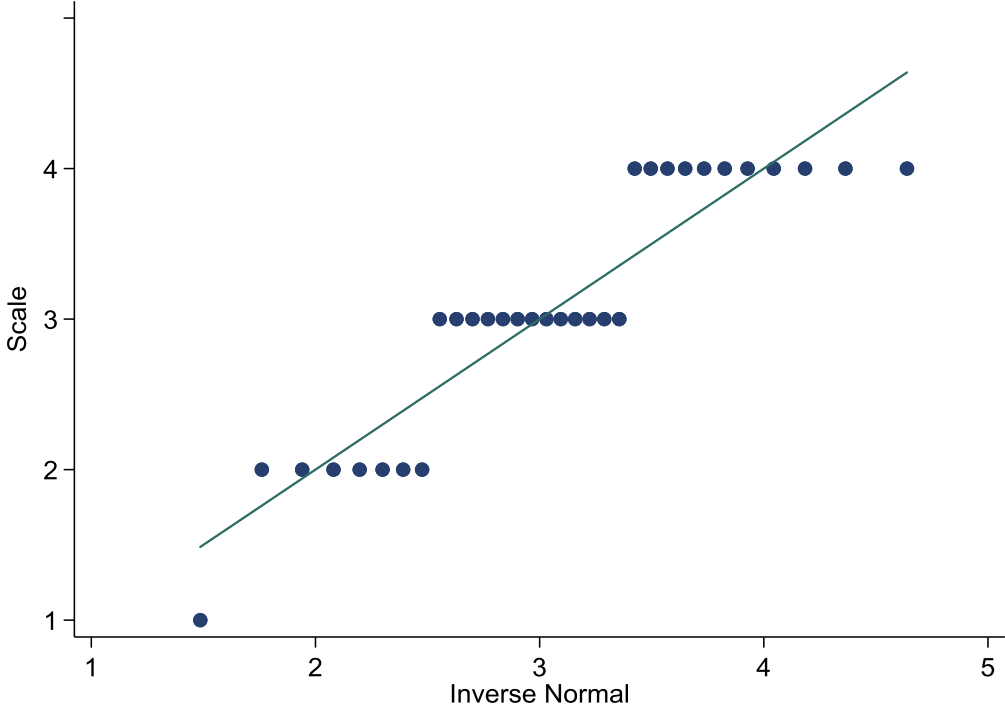

Supplement: MOESM3 [file 17111860]
